# Supplementary material for: Statistical Joint Modeling on Longitudinal Body Weight and CD4 Cell Progression with Survival Time-to-Death Predictors on HIV/AIDS Patients in Mekelle General Hospital, Ethiopia
Source: Research Square preprint supplement (doi:10.21203/rs.3.rs-121687/v1), 2020-12-09
Supplement: Supplementary file 1 [file 8493b52af128656772ed4ea6.docx]

***Supplementary material for Statistical Joint Modeling on Longitudinal Body Weight and CD4 Cell Progression with Survival Time-to-Death Predictors on HIV/AIDS Patients in Mekelle General Hospital, Ethiopia***

1GebruGebremeskelGebrerufael,2Zeytu Gashaw Asfaw,3*Dessie MeleseChekole

*corresponding author

1. Department of Statistics, College of Natural and Computational Science, Adigrat University, Adigrat, Ethiopia.
2. Department of Statistics, College of Natural and Computational Science, Hawassa University, Hawassa, Ethiopia.
3. Department of Statistics, College of Natural and Computational Science, University of Gondar, Gondar, Ethiopia.

| **Table 1:Patient’s characteristics of HIV/AIDS data from Mekelle General Hospital** | | | | | |
| --- | --- | --- | --- | --- | --- |
| **№** | Covariates | Categories | Total No of patient’s (%) | Observed death (%) |  |
| 1 | Sex | Female | 134 (62%) | 10(4.6%) |  |
|  |  | Male | 82(38%) | 21(9.7%) |  |
| 2 | Education level | Illiterate | 57(26.4%) | 16(7.4%) |  |
|  |  | Elementary | 45(20.8%) | 8(3.7%) |  |
|  |  | Secondary | 74(34.3%) | 6(2.8%) |  |
|  |  | Tertiary | 40(18.5%) | 1(0.46%) |  |
| 3 | Marital status | Single | 54(25%) | 7(3.2%) |  |
|  |  | Married | 109(50.5%) | 11(5%) |  |
|  |  | Divorced | 39(18%) | 5(2.3%) |  |
|  |  | Widowed | 14(6.5%) | 8(3.7%) |  |
| 4 | Functional status | Working | 146(67.6%) | 10(4.6%) |  |
|  |  | Ambulatory | 55(25.5%) | 13(6%) |  |
|  |  | Bedridden | 15(6.9%) | 8(3.7%) |  |
| 5 | WHO clinical stage | Stage-I | 93(43%) | 8 (3.7%) |  |
|  |  | Stage-II | 63(29.2%) | 5(2.3%) |  |
|  |  | Stage-III | 45(20.8%) | 12 (5.6%) |  |
|  |  | Stage-IV | 15(6.9%) | 6(2.8%) |  |
| 6 | HIV/TB infection | No | 193(89.4%) | 21(10.9%) |  |
|  |  | Yes | 23(10.7%) | 10(43.6%) |  |
| 7 | Adherence on treatment | good | 96 (44.5%) | 5(2.3%) |  |
|  |  | Fair | 74 (34.2%) | 10(4.6%) |  |
|  |  | Poor | 46 (21.29%) | 13(6%) |  |
| 8 | Occupational status | unemployed | 163(75.5%) | 23(10.7%) |  |
|  |  | Employed | 53(24.5%) | 8(3.7%) |  |
| 9 | Place of residence | urban | 130(60.2%) | 11(5%) |  |
|  |  | Rural | 86(39.8%) | 20(9.3%) |  |
| 10 | Type of ART regiment | TDF+3TC+EFV | 135(62.5%) | 12(5.6%) |  |
|  |  | D4t+3TC+NVP | 20(9.25%) | 13(6%) |  |
|  |  | AZT+3TC+NVP | 40(18.5%) | 13(6%) |  |
|  |  | AZT+3TC+EFV | 21(9.7%) | 3(1.4%) |  |
|  | Continuous variables | mean | standard deviation |  |  |
| 11 | CD4 at base line | 311 | 163.6 |  |  |
| 12 | Body weight at base line | 49.2 | 9.85 |  |  |
| 13 | Hemoglobin at base line | 13.6 | 1.98 |  |  |
| 14 | Age at base line | 34.8 | 11 |  |  |

**Table2: shows the Comparison of separate and joint model analysis √(CD4 cell) with Survival Time-to-Death.**

| No. | Parameter | Separate model analysis of survival analysis | | | | Joint model sub model | | | |
| --- | --- | --- | --- | --- | --- | --- | --- | --- | --- |
|  | Fixed effect | B̑ | Se(B̑) | z-value | Pr(>|z|)   |  | | --- | | B̑ | Se(B̑) | z-value | p-value |
| 1 | Function status |  |  |  |  |  |  |  |  |
| Bedridden(R) | ------- | ------- | ------- | ------- | ------- | ------- | ------- | ------- |
| Ambulatory | -0.732 | 0.595 | -1.231 | 0.218 | -0.5247 | 1.0577 | -0.496 | 0.125 |
| Working | -0.4316 | 0.7092 | -0.609 | 0.5428 | -0.42 | 1.0332 | -0.4065 | 0.178 |
| 2 | Baseline CD4 | -0.00513 | 0.001433 | -3.578 | 0.00037* | -0.0045 | 0.0015 | -3.053 | 0.0023* |
| 3 | Adherence |  |  |  |  |  |  |  |  |
| Poor(R) | ------- | ------- | ------- | ------- | ------- | ------- | ------- | ------- |
| Fair | -1.493 | 0.513 | -2.914 | 0.00357* | -1.5526 | 0.5323 | -2.92 | 0.0035* |
| Good | -1.837 | 0.64098 | -2.866 | 0.004163* | -1.735 | 0.6405 | -2.709 | 0.0068* |
| 4 | Baseline weight | 0.0402 | 0.0229 | 1.755 | 0.04791* | 0.0433 | 0.0227 | 1.9755 | 0.04793* |
| 5 | Sex |  |  |  |  |  |  |  |  |
| female(R) | ------- | ------- | ------- | ------- | ------- | ------- | ------- | ------- |
| Male | 1.443 | 0.494 | 2.921 | 0.00349* | 1.227 | 0.486 | 2.522 | 0.0117* |
| 6 | HIV/TB status |  |  |  |  |  |  |  |  |
| No(R) | ------- | ------- | ------- | ------- | ------- | ------- | ------- | ------- |
| Yes | 1.899 | 0.745 | 2.55 | 0.023* | 2.101 | 0.676 | 3.1 | 0.0210* |
| **Separate model analysis of longitudinal** | | | | **Joint model sub model** | | | | |
| Paraeters | B̑ | Se(B̑) | z-value | Pr(>|z|)   |  | | --- | | B̑ | Se(B̑) | z-value | 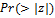 |
|  | Intercept | 16.01 | 2.0398 | 7.86 | 0.0000* | 16.053 | 1.98 | 8.1 | <0.0001* |
| 1 | Time | -0.826 | 0.274 | -3.01 | 0.0027* | -0.827 | 0.2702 | -3.06 | 0.0022* |
| 2 | Baseline CD4 | 0.0213 | 0.0018 | 12.2 | 0.0000* | 0.0234 | 0.00051 | 10.5 | 0.0000* |
| 3 | Baseline weight | 0.061 | 0.0267 | 2.268 | 0.0244* | 0.0605 | 0.0258 | 2.346 | 0.019* |
| 4 | Function status |  |  |  |  |  |  |  |  |
| Bedridden(R) | ------- | ------- | ------- | ------- | ------- | ------- | ------- | ------- |
| Ambulatory | -3.84 | 1.71 | -2.246 | 0.0258* | -3.85 | 1.665 | -2.31 | 0.0207* |
| Working | -2.649 | 1.72 | -1.536 | 0.1261 | -2.665 | 1.679 | -1.587 | 0.1124 |
| 5 | HIV/TB status |  |  |  |  |  |  |  |  |
| HIV/TB(R) | ------- | ------- | ------- | ------- | ------- | ------- | ------- | ------- |
| HIV/TB(yes) | -3.2 | 1.276 | -2.51 | 0.0130* | -2.169 | 1.245 | -1.735 | 0.109 |
| 6 | Education-level |  |  |  |  |  |  |  |  |
| Illiterate(R) | ------- | ------- | ------- | ------- | ------- | ------- | ------- | ------- |
| primary | 0.2232 | 0.698 | 0.32033 | 0.7491 | 0.2195 | 0.6709 | 0.3272 | 0.7435 |
| secondary | 0.5004 | 0.626 | 0.7999 | 0.4247 | 0.495 | 0.6027 | 0.8214 | 0.4114 |
| Tertiary | 0.50056 | 0.737 | 0.6795 | 0.4976 | 0.4954 | 0.7097 | 0.6981 | 0.4851 |
| 7 | Age | -0.0279 | 0.0228 | -1.22 | 0.223 | -0.0278 | 0.0224 | -1.243 | 0.2138 |
| 8 | Adherence |  |  |  |  |  |  |  |  |
| Poor(R) | ------- | ------- | ------- | ------- | ------- | ------- | ------- | ------- |
| Fair | 1.723 | 1.015 | 1.698 | 0.0911 | 1.73 | 0.9898 | 1.7485 | 0.0804 |
| Good | 0.73 | 1.066 | 0.685 | 0.494 | 0.7445 | 1.04 | 0.7158 | 0.4741 |
| 9 | WHO stage |  |  |  |  |  |  |  |  |
| Stage-4(R) | ------- | ------- | ------- | ------- | ------- | ------- | ------- | ------- |
| Stage-3 | 1.11 | 1.24 | 0.895 | 0.372 | 1.097 | 1.2 | 0.9137 | 0.3609 |
| Stage-2 | 1.19 | 1.25 | 0.955 | 0.341 | 1.19 | 1.2065 | 0.9892 | 0.3226 |
| Stage-1 | 2.199 | 1.288 | 1.71 | 0.089 | 2.189 | 1.2454 | 1.758 | 0.0789 |
| 10 | Marital status |  |  |  |  |  |  |  |  |
| Single(R) | ------- | ------- | ------- | ------- | ------- | ------- | ------- | ------- |
| married | -1.181 | 0.5642 | -2.094 | 0.0375* | -1.178 | 0.5442 | 2.164 | 0.00304* |
| Divorced | -1.3357 | 0.731 | -1.827 | 0.059 | -1.338 | 0.7086 | -1.988 | 0.049* |
| Widowed | -0.647 | 1.037 | -0.624 | 0.533 | -0.6537 | 0.998 | -0.655 | 0.5125 |
| 11 | Time*Baseline CD4 | 0.0028 | 0.00037 | 7.512 | 0.0000* | 0.00194 | 0.000191 | 5.322 | <0.0001* |
| 12 | Time*HIV/TB |  |  |  |  |  |  |  |  |
| Time*No(R) | ------- | ------- | ------- | ------- | ------- | ------- | ------- | ------- |
| Time*Yes | 0.531 | 0.236 | 2.25 | 0.025* | 0.5209 | 0.233 | 2.239 | 0.025* |
| 13 | Time*function-status |  |  |  |  |  |  |  |  |
| Time*Bedridden(R) | ------- | ------- | ------- | ------- | ------- | ------- | ------- | ------- |
| Time*Ambulatory | 0.923 | 0.297 | 3.102 | 0.002* | 0.926 | 0.2925 | 3.165 | 0.0015* |
| Time*working | 0.905 | 0.296 | 3.06 | 0.0023* | 0.91 | 0.291 | 3.126 | 0.0018* |
|  | Random effect | variance | Std.Dev |  |  | variance | 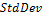 |  |  |
|  | (Intercept) | 19.98 | 4.47 |  |  | 18.49 | 4.3 |  |  |
|  | Time | 0.5476 | 0.74 |  |  | 0.5184 | 0.72 |  |  |
|  | Residual | 6.0025 | 2.45 |  |  | 5.9731 | 2.444 |  |  |
|  | Association | -------- | -------- | -------- | -------- | -0.6693 | 0.336 | -1.992 | 0.0367* |
|  | AIC | 6823.45 |  |  |  | 6602.83 |  |  |  |
|  | *P -value< 0.05 | R = reference group | |  |  |  |  |  |  |
